# Supplementary material
Source: PubMed Central journal article supplement (PMC8530240)
Supplement: jpcrr-8.4.323_suppl_table_S1.pdf [file jpcrr-8.4.323_suppl_table_S1.pdf]

**Table S1.** Focus Group and Interview Structured Question Guide

---

**I. Questions regarding intervention activities and sustainability**

- a. This project targeted breast cancer, cervical cancer and colorectal cancer screening. Can you briefly describe your practice's priorities across these three cancer types?
  - i. *Probe:* for example, did your practice try to implement strategies on all 3 cancers, or did you focus on one cancer type?
- b. How did you determine your focus for this year's project?
- c. How did last year's work shape what you worked on this year?
  - i. How do your challenges with screening vary by each cancer? How did these challenges shape your strategies?
  - ii. How did your work in cancer screening influence practice policies? For example, did your practice implement any new policies related to cancer screening?
- d. What plans does your practice have to continue this work?
  - i. How important were the monetary incentives offered under this project (e.g. project stipend)?
- e. What were your practice's biggest barriers to increasing screening for each cancer type?
  - i. *Probe:* Are there particular barriers that affect your patient population, such as transportation? What about barriers in dealing with other parts of the healthcare system, such as specialists or insurance companies?
- f. How would you describe the level of involvement across the staff at your practice in this project?
  - i. Was there a particular individual in the practice that championed the project? How?

**II. Questions regarding practice facilitator (PF) interactions**

- a. Overall, how did the PF impact your practice?
  - i. *Probe:* How useful to your practice was it to have a practice facilitator?
- b. How did the facilitator interact with providers and staff at the practice? Who was their main contact?
  - i. How important were these relationships in terms of achieving project goals?
- c. What type of interaction would you like to see with your practice facilitator?
- d. What types of quality improvement topics were reviewed by your practice facilitator?
  - i. How did you incorporate these quality improvement ideas into your work on cancer screening?
  - ii. What is the quality improvement culture like at your practice?

**III. Where do you most need help? How would having this need met affect your strategies to increase cancer screenings?\***

- a. In thinking about the next 2 to 3 years, what could you do to have the largest impact on improving cancer screening rates?

**IV. Do you have any comments or feedback you'd like to share in regard to the project administration?**

---

*\*Part III, including the follow-up question, were added to the guide for year 6 in order to discuss barriers to sustainability.*
